# Supplementary material for: Germline Transgenesis and Insertional Mutagenesis in Schistosoma mansoni Mediated by Murine Leukemia Virus
Source: PLoS Pathog. 2012 Jul 26;8(7):e1002820. doi: 10.1371/journal.ppat.1002820 (PMC3406096; doi:10.1371/journal.ppat.1002820)
Supplement: Table S1 — Sequences of nucleotide primers used in Illumina sequencing. The tab “Primer combinations” summarizes which primers were used for the two PCR reactions per library, and which primer for sequencing (Illumina Read 1). (XLSX) [file ppat.1002820.s004.xlsx]

## Sheet: Primer combinations
		P5 end (transposon)	P7 end (adapter)
binding site	Reaction type	P5 primer name	P7 primer name	tag	for vector	transposon start
	PCR1 5'end	Sch_5prF1	RInV4.0	none	all
MLV end	PCR2 5'end	Sch_P5_5prF2	RInV 4.9	GGCTACAG	Basic MLV pLNHX 5'end 5pr F1, P5 F2
			RInV 4.17	TGTACCTT	ActGFP pLNHX 5'end 5pr F1, P5 F2
			RInV 4.25	TGCGATCT	SL GFP pLNHX 5'end 5pr F1, P5 F2
			RInV 4.34	TAACGCTG	ActLuc pLNHX 5'end 5pr F1, P5 F2
	Sequencing 5'end	Sch_5pr__seq				TTTCAAA
	PCR1 5'end	Sch_5prF3	RInV4.0	none	all
500 bp from end	PCR2 5'end	Sch_5pr_P5_F3a	RInV 4.10	CTTGTACT	Basic MLV pLNHX 5'end 5pr F3, P5 F3a
			RInV 4.18	TTCTGTGT	ActGFP pLNHX 5'end 5pr F3, P5 F3a
			RInV 4.27	TAGTGACT	SL GFP pLNHX 5'end 5pr F3, P5 F3a
			RInV 4.35	TTGGTATG	ActLuc pLNHX 5'end 5pr F3, P5 F3a
	Sequencing 5'end	Sch_5pr_F3a_seq1				GGTACCCGGG
	PCR1 5'end	Sch_5prF4	RInV4.0	none	all
1 kb from end	PCR2 5'end	Sch_5pr_P5_F4a	RInV 4.11	ACTTGATG	Basic MLV pLNHX 5'end 5pr F4, P5 F4a
			RInV 4.19	TCTGCTGT	ActGFP pLNHX 5'end 5pr F4, P5 F4a
			RInV 4.28	TACAGGAT	SL GFP pLNHX 5'end 5pr F4, P5 F4a
			RInV 4.36	TGAACTGG	ActLuc pLNHX 5'end 5pr F4, P5 F4a
	Sequencing 5'end	Sch_5pr F4a_seq1				AGACGGAGGC
	PCR1 5'end	Sch_5prF5	RInV4.0	none	all
1.5 kb from end	PCR2 5'end	Sch_5pr_P5_F5a	RInV 4.12	TGACCACT	Basic MLV pLNHX 5'end 5pr F5, P5 F5a
			RInV 4.20	TTGGAGGT	ActGFP pLNHX 5'end 5pr F5, P5 F5a
			RInV 4.29	TCCTCAAT	SL GFP pLNHX 5'end 5pr F5, P5 F5a
			RInV 4.37	TACTTCGG	ActLuc pLNHX 5'end 5pr F5, P5 F5a
	Sequencing 5'end	Sch_5pr F5a_seq1				CAAGGTGAGAT
	PCR1 3'end	Sch_3prF1	RInV4.0	none	all
MLV end	PCR2 3'end	Sch P5_3prF2	RInV 4.13	TGGTTGTT	Basic MLV pLNHX 3'end 3pr F1, P5 F2
			RInV 4.21	TCGAGCGT	ActGFP pLNHX 3'end 3pr F1, P5 F2
			RInV 4.30	TGTGGTTG	SL GFP pLNHX 3'end 3pr F1, P5 F2
			RInV 4.38	TCTCACGG	ActLuc pLNHX 3'end 3pr F1, P5 F2
	Sequencing 3'end	Sch 3pr__seq				TTTCATT
	PCR1 3'end	Sch_3prF3	RInV4.0	none	all
200 bp from end	PCR2 3'end	Sch_3pr_P5_F3a	RInV 4.14	TCTCGGTT	Basic MLV pLNHX 3'end 3pr F3, P5 F3a
			RInV 4.22	TGATACGT	ActGFP pLNHX 3'end 3pr F3, P5 F3a
			RInV 4.31	TAGTCTTG	SL GFP pLNHX 3'end 3pr F3, P5 F3a
500 bp from end			RInV 4.39	TCAGGAGG	ActLuc pLNHX 3'end 3pr F3, P5 F3a
	Sequencing 3'end	Sch_3pr_F3a_seq1				GCCAAACAGG
	PCR1 3'end	Sch_3prF4	RInV4.0	none	all
1 kb from end	PCR2 3'end	Sch_3pr_P5_F4a	RInV 4.23	TGCATAGT	ActGFP pLNHX 3'end 3pr F4, P5 F4a
			RInV 4.42	TGTATGCG	SL GFP pLNHX 3'end 3pr F4, P5 F4a
	Sequencing 3'end	Sch_3pr F4_seq1				GCCACAACAT
	PCR1 3'end	Sch_3prF5_2	RInV4.0	none	all
1.3 kb from end	PCR2 3'end	Sch_3pr P5 F5a	RInV 4.24	TTGACTCT	ActGFP pLNHX 3'end 3pr F5-2, P5 F5a
	Sequencing 3'end	Sch_3prF5a_seq1				GGCAAGCTGC
	PCR1 3'end	Sch_3prF6	RInV4.0	none	all
1 kb from end	PCR2 3'end	Sch_3pr_P5_F6a	RInV 4.15	TAAGCGTT	Basic MLV pLNHX 3'end 3pr F6, P5 F6a
	Sequencing 3'end	Sch_3prF6a_seq1				GAGAGAGCGCG
	PCR1 3'end	Sch_3prF7	RInV4.0	none	all
1.4 kb from end	PCR2 3'end	Sch_3prF7a_seq1	RInV 4.16	TCCGTCTT	Basic MLV pLNHX 3'end 3pr F7, P5 F7a
	Sequencing 3'end	Sch_3pr_P5_F7a				GGTGTGGCGG
	PCR1 3'end	Sch_3prF8_2	RInV4.0	none	all
1.4 kb from end	PCR2 3'end	Sch_3pr P5_F8a	RInV 4.33	TCGAAGTG	SL GFP pLNHX 3'end 3pr F8-2, P5 F8a
	Sequencing 3'end	Sch_3prF8a_seq1				GAGGGCGATG
	PCR1 3'end	Sch_3prF9	RInV4.0	none	all
1 kb from end	PCR2 3'end	Sch_3pr_P5_F9a	RInV 4.40	TAAGTTCG	ActLuc pLNHX 3'end 3pr F9, P5 F9a
	Sequencing 3'end	Sch_3prF9a_seq1				TGTCGCAGGT
	PCR1 3'end	Sch_3prF10	RInV4.0	none	all
1.5 kb from end	PCR2 3'end	Sch_3pr P5_F10a	RInV 4.41	TCCAGTCG	ActLuc pLNHX 3'end 3pr F10, P5 F10a
	Sequencing 3'end	Sch_3prF10a_seq1				GGTGCCAACC

## Sheet: MLV primers
Sch_5prF1	ACCTTGATCTGAACTTTTCTATTCTCAG
Sch_P5_5prF2	AATGATACGGCGACCACCGAGATCTACACGTTACTTAAGCTAGCTTGCCACCTAC	MLV end	all vectors
Sch_5pr__seq	CTAGCTTGCCACCTACGGGTGGGGTC
Sch_5prF3	GTGGGTAGTCAATCACTCAGAGGAGAC
Sch_5pr_P5_F3a	AATGATACGGCGACCACCGAGATCTACACGATGCAAACAGCAAGAGGCTTTATTG	500 bp from end	all vectors
Sch_5pr_F3a_seq1	AGCAAGAGGCTTTATTGGGAATACG
Sch_5prF4	CTTGATCAGATCGGAAAACAGCTTTAAC
Sch_5pr_P5_F4a	AATGATACGGCGACCACCGAGATCTACACAATCCTAGGCTGAGATGGATCTATTGG	1 kb from end	all vectors
Sch_5pr F4a_seq1	GGTTCCAAACCGAAAGCAAAAATTC
Sch_5prF5	GATGTTTCGCTTGGTGGTCGAATG
Sch_5pr_P5_F5a	AATGATACGGCGACCACCGAGATCTACACATTGCATCAGCCATGATGGATACTTTCTC	1.5 kb from end	all vectors
Sch_5pr F5a_seq1	GATGGATACTTTCTCGGCAGGAG
Sch_3prF1	TGTGGTCTCGCTGTTCCTTG
Sch P5_3prF2	AATGATACGGCGACCACCGAGATCTACACGGTCTCCTCTGAGTGATTGACTAC	MLV end	all vectors
Sch 3pr__seq	TGATTGACTACCCGTCAGCGGGGGTC
Sch_3prF3	TGCAAGGCATGGAAAAATACATAACTG
Sch_3pr_P5_F3a	AATGATACGGCGACCACCGAGATCTACACGAGAATAGAGAAGTTCAGATCAAG	500 bp from end	all vectors
Sch_3pr_F3a_seq1	GAACAGATGGAACAGCTGAATATGG
Sch_3prF4	GAGTACAACTACAACAGCCACAACGTC
Sch_3pr_P5_F4a	AATGATACGGCGACCACCGAGATCTACACTATATCATGGCAGACAAGCAGAAGAAC	1 kb from end	ActGFP pLNHX 3'end
Sch_3pr F4_seq1	CGGCATCAAGGTGAACTTCAAGATCC
Sch_3prF5_2	GACGTAAACGGCCACAAGTTCAGC
Sch_3pr P5 F5a	AATGATACGGCGACCACCGAGATCTACACAAGCTGACCCTGAAGTTCATCT	1.5 kb from end	ActGFP pLNHX 3'end
Sch_3prF5a_seq1	ACCCTGAAGTTCATCTGCACCACC
Sch_3prF6	CTCTGCACTAATGCTCTCTCACTCTGTC
Sch_3pr_P5_F6a	AATGATACGGCGACCACCGAGATCTACACGTCACACAGTAAACGGCATACTGCTCTC	1 kb from end	Basic MLV pLNHX 3'end
Sch_3prF6a_seq1	AACGGCATACTGCTCTCGTTGGTTC
Sch_3prF7	CTTGCCGAATATCATGGTGGAAAA
Sch_3prF7a_seq1	GATTCATCGACTGTGGCCGGCTG	1.5 kb from end	Basic MLV pLNHX 3'end
Sch_3pr_P5_F7a	AATGATACGGCGACCACCGAGATCTACACGCTTTTCTGGATTCATCGACTGTG
Sch_3prF8_2	CATCCTGATCGAGCTGGACGGCGACGTA
Sch_3pr P5_F8a	AATGATACGGCGACCACCGAGATCTACACAACGGCCACAAGTTCAGCGTGTCC	1 kb from end	SL GFP pLNHX 3'end
Sch_3prF8a_seq1	AAGTTCAGCGTGTCCGGCGAGGGC
Sch_3prF9	CCGCCTGAAGTCTCTGATTAAGTACAA
Sch_3pr_P5_F9a	AATGATACGGCGACCACCGAGATCTACACATTGGAATCCATCTTGCTCCAACAC	500 bp from end	ActLuc pLNHX 3'end
Sch_3prF9a_seq1	AACACCCCAACATCTTCGACGCAGG
Sch_3prF10	AAGAGCTGTTTCTGAGGAGCCTTCAGGA
Sch_3pr P5_F10a	AATGATACGGCGACCACCGAGATCTACACAGGAGCCTTCAGGATTACAAGATTCAA	1 kb from end	ActLuc pLNHX 3'end
Sch_3prF10a_seq1	ATTACAAGATTCAAAGTGCGCTGCT

## Sheet: Indexed Illumina P7 primers
Code	Sequence	Tag	Vectors and primers	Retrovirus start	Position
5' end
RInV 4.1_1	CAAGCAGAAGACGGCATACGAGATCGGTACAAGCTAACACTCTTTCCCTACACGACGCTCTTCCGATCT	TAGCTTGT	SL-GFP 5'	TTTCAAA	MLV end
RInV 4.1_2	CAAGCAGAAGACGGCATACGAGATCGGTAAACATCGACACTCTTTCCCTACACGACGCTCTTCCGATCT	CGATGTTT	Basic MLV pLNHX 5'	TTTCAAA	MLV end
RInV 4.1_3	CAAGCAGAAGACGGCATACGAGATCGGTACATTGGCACACTCTTTCCCTACACGACGCTCTTCCGATCT	GCCAATGT	ActLuc 5'	TTTCAAA	MLV end
RInV 4.1_4	CAAGCAGAAGACGGCATACGAGATCGGTACCACTGTACACTCTTTCCCTACACGACGCTCTTCCGATCT	ACAGTGGT	ActGFP 5'	TTTCAAA	MLV end
RInV4.1_9	CAAGCAGAAGACGGCATACGAGATCGGTCTGTAGCCACACTCTTTCCCTACACGACGCTCTTCCGATCT	GGCTACAG	Basic MLV pLNHX 5'end 5pr F1, P5 F2	TTTCAAA	MLV end
RInV4.1_10	CAAGCAGAAGACGGCATACGAGATCGGTAGTACAAGACACTCTTTCCCTACACGACGCTCTTCCGATCT	CTTGTACT	Basic MLV pLNHX 5'end 5pr F3, P5 F3a	GGTACCCGGG	500 bp from end
RInV4.1_11	CAAGCAGAAGACGGCATACGAGATCGGTCATCAAGTACACTCTTTCCCTACACGACGCTCTTCCGATCT	ACTTGATG	Basic MLV pLNHX 5'end 5pr F4, P5 F4a	AGACGGAGGC	1 kb from end
RInV4.1_12	CAAGCAGAAGACGGCATACGAGATCGGTAGTGGTCAACACTCTTTCCCTACACGACGCTCTTCCGATCT	TGACCACT	Basic MLV pLNHX 5'end 5pr F5, P5 F5a	CAAGGTGAGAT	1.5 kb from end
RInV4.1_17	CAAGCAGAAGACGGCATACGAGATCGGTAAGGTACAACACTCTTTCCCTACACGACGCTCTTCCGATCT	TGTACCTT	ActGFP pLNHX 5'end 5pr F1, P5 F2	TTTCAAA	MLV end
RInV4.1_18	CAAGCAGAAGACGGCATACGAGATCGGTACACAGAAACACTCTTTCCCTACACGACGCTCTTCCGATCT	TTCTGTGT	ActGFP pLNHX 5'end 5pr F3, P5 F3a	GGTACCCGGG	500 bp from end
RInV4.1_19	CAAGCAGAAGACGGCATACGAGATCGGTACAGCAGAACACTCTTTCCCTACACGACGCTCTTCCGATCT	TCTGCTGT	ActGFP pLNHX 5'end 5pr F4, P5 F4a	AGACGGAGGC	1 kb from end
RInV4.1_20	CAAGCAGAAGACGGCATACGAGATCGGTACCTCCAAACACTCTTTCCCTACACGACGCTCTTCCGATCT	TTGGAGGT	ActGFP pLNHX 5'end 5pr F5, P5 F5a	CAAGGTGAGAT	1.5 kb from end
RInV4.1_25	CAAGCAGAAGACGGCATACGAGATCGGTAGATCGCAACACTCTTTCCCTACACGACGCTCTTCCGATCT	TGCGATCT	SL GFP pLNHX 5'end 5pr F1, P5 F2	TTTCAAA	MLV end
RInV4.1_27	CAAGCAGAAGACGGCATACGAGATCGGTAGTCACTAACACTCTTTCCCTACACGACGCTCTTCCGATCT	TAGTGACT	SL GFP pLNHX 5'end 5pr F3, P5 F3a	GGTACCCGGG	500 bp from end
RInV4.1_28	CAAGCAGAAGACGGCATACGAGATCGGTATCCTGTAACACTCTTTCCCTACACGACGCTCTTCCGATCT	TACAGGAT	SL GFP pLNHX 5'end 5pr F4, P5 F4a	AGACGGAGGC	1 kb from end
RInV4.1_29	CAAGCAGAAGACGGCATACGAGATCGGTATTGAGGAACACTCTTTCCCTACACGACGCTCTTCCGATCT	TCCTCAAT	SL GFP pLNHX 5'end 5pr F5, P5 F5a	CAAGGTGAGAT	1.5 kb from end
RInV4.1_34	CAAGCAGAAGACGGCATACGAGATCGGTCAGCGTTAACACTCTTTCCCTACACGACGCTCTTCCGATCT	TAACGCTG	ActLuc pLNHX 5'end 5pr F1, P5 F2	TTTCAAA	MLV end
RInV4.1_35	CAAGCAGAAGACGGCATACGAGATCGGTCATACCAAACACTCTTTCCCTACACGACGCTCTTCCGATCT	TTGGTATG	ActLuc pLNHX 5'end 5pr F3, P5 F3a	GGTACCCGGG	500 bp from end
RInV4.1_36	CAAGCAGAAGACGGCATACGAGATCGGTCCAGTTCAACACTCTTTCCCTACACGACGCTCTTCCGATCT	TGAACTGG	ActLuc pLNHX 5'end 5pr F4, P5 F4a	AGACGGAGGC	1 kb from end
RInV4.1_37	CAAGCAGAAGACGGCATACGAGATCGGTCCGAAGTAACACTCTTTCCCTACACGACGCTCTTCCGATCT	TACTTCGG	ActLuc pLNHX 5'end 5pr F5, P5 F5a	CAAGGTGAGAT	1.5 kb from end
3' end
RInV 4.1_5	CAAGCAGAAGACGGCATACGAGATCGGTAACGTGATACACTCTTTCCCTACACGACGCTCTTCCGATCT	ATCACGTT	SL-GFP 3'	TTTCATT	MLV end
RInV 4.1_6	CAAGCAGAAGACGGCATACGAGATCGGTCGCTGATCACACTCTTTCCCTACACGACGCTCTTCCGATCT	GATCAGCG	Basic MLV pLNHX 3'	TTTCATT	MLV end
RInV 4.1_7	CAAGCAGAAGACGGCATACGAGATCGGTCAGATCTGACACTCTTTCCCTACACGACGCTCTTCCGATCT	CAGATCTG	ActLuc 3'	TTTCATT	MLV end
RInV 4.1_8	CAAGCAGAAGACGGCATACGAGATCGGTATGCCTAAACACTCTTTCCCTACACGACGCTCTTCCGATCT	TTAGGCAT	ActGFP 3'	TTTCATT	MLV end
RInV4.1_13	CAAGCAGAAGACGGCATACGAGATCGGTAACAACCAACACTCTTTCCCTACACGACGCTCTTCCGATCT	TGGTTGTT	Basic MLV pLNHX 3'end 3pr F1, P5 F2	TTTCATT	MLV end
RInV4.1_14	CAAGCAGAAGACGGCATACGAGATCGGTAACCGAGAACACTCTTTCCCTACACGACGCTCTTCCGATCT	TCTCGGTT	Basic MLV pLNHX 3'end 3pr F3, P5 F3a	GCCAAACAGG	500 bp from end
RInV4.1_15	CAAGCAGAAGACGGCATACGAGATCGGTAACGCTTAACACTCTTTCCCTACACGACGCTCTTCCGATCT	TAAGCGTT	Basic MLV pLNHX 3'end 3pr F6, P5 F6a	GGTGTGGCGG	1 kb from end
RInV4.1_16	CAAGCAGAAGACGGCATACGAGATCGGTAAGACGGAACACTCTTTCCCTACACGACGCTCTTCCGATCT	TCCGTCTT	Basic MLV pLNHX 3'end 3pr F7, P5 F7a	GAGAGAGCGCG	1.5 kb from end
RInV4.1_21	CAAGCAGAAGACGGCATACGAGATCGGTACGCTCGAACACTCTTTCCCTACACGACGCTCTTCCGATCT	TCGAGCGT	ActGFP pLNHX 3'end 3pr F1, P5 F2	TTTCATT	MLV end
RInV4.1_22	CAAGCAGAAGACGGCATACGAGATCGGTACGTATCAACACTCTTTCCCTACACGACGCTCTTCCGATCT	TGATACGT	ActGFP pLNHX 3'end 3pr F3, P5 F3a	GCCAAACAGG	500 bp from end
RInV4.1_23	CAAGCAGAAGACGGCATACGAGATCGGTACTATGCAACACTCTTTCCCTACACGACGCTCTTCCGATCT	TGCATAGT	ActGFP pLNHX 3'end 3pr F4, P5 F4a	GCCACAACAT	1 kb from end
RInV4.1_24	CAAGCAGAAGACGGCATACGAGATCGGTAGAGTCAAACACTCTTTCCCTACACGACGCTCTTCCGATCT	TTGACTCT	ActGFP pLNHX 3'end 3pr F5-2!, P5 F5a	GGCAAGCTGC	1.5 kb from end
RInV4.1_30	CAAGCAGAAGACGGCATACGAGATCGGTCAACCACAACACTCTTTCCCTACACGACGCTCTTCCGATCT	TGTGGTTG	SL GFP pLNHX 3'end 3pr F1, P5 F2	TTTCATT	MLV end
RInV4.1_31	CAAGCAGAAGACGGCATACGAGATCGGTCAAGACTAACACTCTTTCCCTACACGACGCTCTTCCGATCT	TAGTCTTG	SL GFP pLNHX 3'end 3pr F3, P5 F3a	GCCAAACAGG	500 bp from end
RInV4.1_33	CAAGCAGAAGACGGCATACGAGATCGGTCACTTCGAACACTCTTTCCCTACACGACGCTCTTCCGATCT	TCGAAGTG	SL GFP pLNHX 3'end 3pr F8-2!, P5 F8a	GCCACAACAT	1 kb from end
RInV4.1_38	CAAGCAGAAGACGGCATACGAGATCGGTCCGTGAGAACACTCTTTCCCTACACGACGCTCTTCCGATCT	TCTCACGG	ActLuc pLNHX 3'end 3pr F1, P5 F2	GAGGGCGATG	1.5 kb from end
RInV4.1_39	CAAGCAGAAGACGGCATACGAGATCGGTCCTCCTGAACACTCTTTCCCTACACGACGCTCTTCCGATCT	TCAGGAGG	ActLuc pLNHX 3'end 3pr F3, P5 F3a	TTTCATT	MLV end
RInV4.1_40	CAAGCAGAAGACGGCATACGAGATCGGTCGAACTTAACACTCTTTCCCTACACGACGCTCTTCCGATCT	TAAGTTCG	ActLuc pLNHX 3'end 3pr F9, P5 F9a	GCCAAACAGG	500 bp from end
RInV4.1_41	CAAGCAGAAGACGGCATACGAGATCGGTCGACTGGAACACTCTTTCCCTACACGACGCTCTTCCGATCT	TCCAGTCG	ActLuc pLNHX 3'end 3pr F10, P5 F10a	TGTCGCAGGT	1 kb from end
RInV4.1_42	CAAGCAGAAGACGGCATACGAGATCGGTCGCATACAACACTCTTTCCCTACACGACGCTCTTCCGATCT	TGTATGCG	SL GFP pLNHX 3'end 3pr F4, P5 F4a	GGTGCCAACC	1.5 kb from end
